# Supplementary material for: From Wastes To Functions: Preparation of Layered Double Hydroxides From Industrial Waste And Its Removal Performance Towards Phosphates
Source: Research Square preprint supplement (doi:10.21203/rs.3.rs-633550/v1), 2021-07-12
Supplement: Supplementary file 1 [file 5209bce27d0c18958d77253b.docx]

**From wastes to functions: Preparation of layered double hydroxides from industrial waste and its removal performance towards phosphates**

Liping Xiaoa, *, Yan Lib, Qiaoping Konga, [[1]](#footnote-0)*, Yunlong Lana

a School of Environmental and Municipal Engineering, Qingdao University of Technology, Qingdao 266033, PR China

b School of Civil Engineering, Liaoning Technical University, Fuxin 123000, PR China

***Supporting information for “*2.1. Chemicals and materials*”***


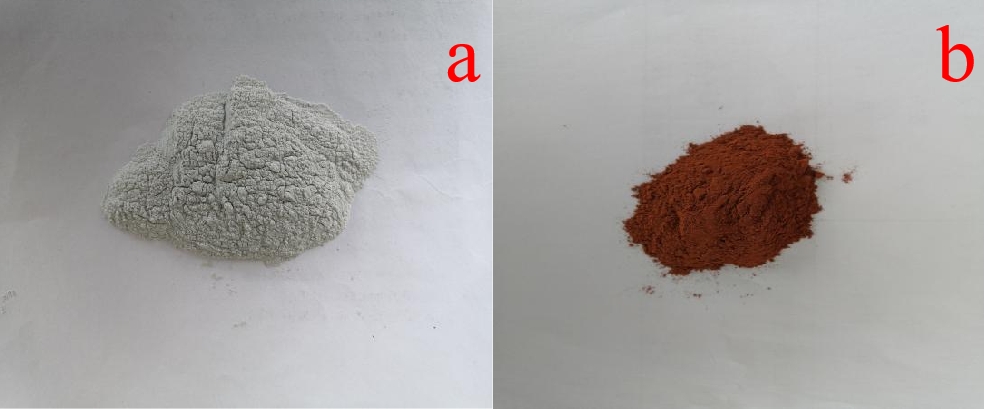


Fig. S1 The picture of raw calcium carbide slag powder (a) and red mud powder.

Table S1 The chemical composition of calcium carbide slag.

| Component | CaO | Al2O3 | MgO | SiO2 | Fe2O3 | Others |
| --- | --- | --- | --- | --- | --- | --- |
| Composition（*w*/%） | 89.94 | 2.81 | 0.14 | 5.69 | 0.29 | 1.13 |

Table S2 The chemical composition of red mud.

| Component | CaO | Al2O3 | Na2O | SiO2 | Fe2O3 | Others |
| --- | --- | --- | --- | --- | --- | --- |
| Composition（*w*/%） | 4.48 | 16.91 | 3.06 | 6.60 | 46.41 | 22.54 |

***Supporting information for “*2.2. Preparation of CR-LDH*”***


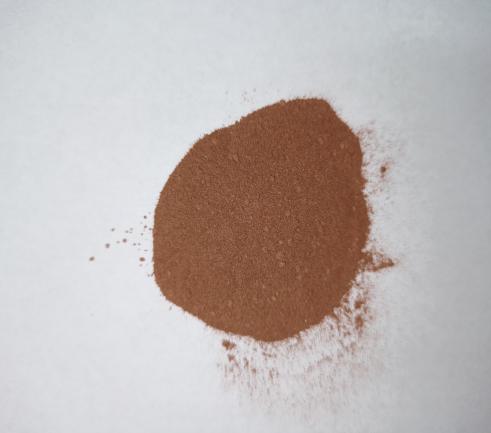


Fig. S2 Picture of CR-LDHs.

***Supporting information for “*3.2.7 Application of CR-LDH to practical phosphate-containing wastewater*”***


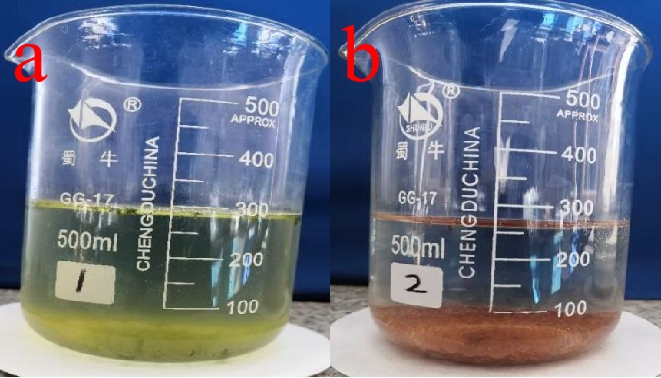


Fig. S3 Photos of practical phosphate-containing wastewater before CR-LDH adsorption (a) and after CR-LDH adsorption (b).

***Supporting information for “3.3* Adsorption mechanism*”***





Fig. S4 FT-IR pattern of CR-LDH before and after adsorption of phosphate.

1. * Corresponding author at: School of Environmental and Municipal Engineering, Qingdao University of Technology, Qingdao 266033, PR China.

   mail address: [xxllpp11@126.com (L. P. Xiao);](mailto:xxllpp11@126.com;) [kongqiaoping@qut.edu.cn](mailto:kongqiaoping@qut.edu.cn) (Q. P. Kong) [↑](#footnote-ref-0)
